# Supplementary material for: A Cost-Effective Approach to Optimizing Microstructure and Magnetic Properties in Ce17Fe78B6 Alloys
Source: MDPI journal article supplement (doi:10.3390/ma10080869), 2017-07-28
Supplement: s1 [file s1]

# Supplementary Materials: A cost-effective approach to optimizing microstructure and magnetic properties in $\text{Ce}_{17}\text{Fe}_{78}\text{B}_6$ alloys

Xiaohua Tan, Heyun Li, Hui Xu, Ke Han, Weidan Li, Fang Zhang

Figure S1 shows the grain size distribution of  $\text{Ce}_2\text{Fe}_{14}\text{B}$  and  $\text{CeFe}_2$  phases in samples P2-15, P5-15 and P7-15. The average grain size of both phases decreased with an increase of chamber pressure.

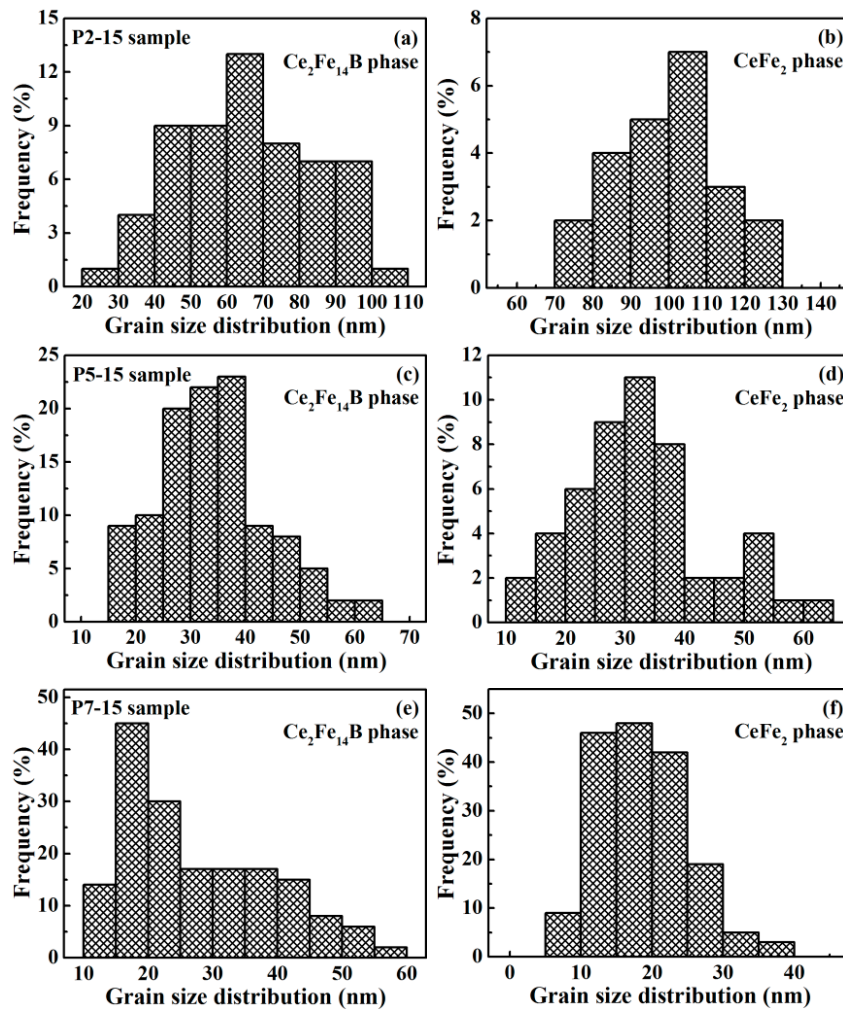

**Figure S1.** Grain size distribution of  $\text{Ce}_2\text{Fe}_{14}\text{B}$  and  $\text{CeFe}_2$  phases in as-spun  $\text{Ce}_{17}\text{Fe}_{78}\text{B}_6$  ribbons: (a) (b)

P2-15 sample, (c) (d) P5-15 sample, and (e) (f) P7-15 sample.

Table S1 The grain size ( $d$ ) of  $\text{Ce}_2\text{Fe}_{14}\text{B}$  and  $\text{CeFe}_2$  phases of  $\text{Ce}_{17}\text{Fe}_{78}\text{B}_6$  ribbons prepared at various chamber pressure ( $P_{\text{chamber}}$ ) and the wheel speed ( $v$ ) of  $15 \text{ m}\cdot\text{s}^{-1}$ .

| Samples | $P_{\text{chamber}}$ (MPa) | $v$ ( $\text{m}\cdot\text{s}^{-1}$ ) | $d_{\text{Ce}_2\text{Fe}_{14}\text{B}}$ (nm) | $d_{\text{CeFe}_2}$ (nm) |
|---------|----------------------------|--------------------------------------|----------------------------------------------|--------------------------|
| P2-15   | 0.02                       | 15                                   | $66 \pm 18$                                  | $100 \pm 13$             |
| P5-15   | 0.05                       | 15                                   | $34 \pm 9$                                   | $32 \pm 10$              |
| P7-15   | 0.07                       | 15                                   | $27 \pm 11$                                  | $19 \pm 6$               |
